# Supplementary material
Source: publisher figshare collection journal article supplement (https://springernature.figshare.com/ndownloader/files/14788577)
Supplement: Supplementary file 1 [file 14788577]

## Sheet: Sheet1
Coder ID	Study ID	Author	Publication year	Publication type	Journal, if applicable	Reason for rejection	Issue	Country	Study year	Location (lat, long)	Study subject	Intervention	Comparator	Forest type	Soil type	Study design	Study length	Sampling method	Sample size C/B	Sample size I/A	Mean C	SD C	SE C	Mean I	SD I	SE I	r	Χ2	t	df	F	p	Size of area harvested	Age of the forest	Climatic conditions	Humidity	Connectivity	Management type	Certification	Owner	Harvesting of energy wood	Type of retention	Amount of retention trees	Amount of deadwood	Description of landscape matrix
